# Supplementary material
Source: PubMed Central journal article supplement (PMC2847089)
Supplement: bgp334_1.pdf [file bgp334_1.pdf]

**Supplemental Table 1:** Food groups and individual food items

---

| <b>Food group</b>                  | <b>Food item</b>                                                                                                                                                                                                                                                              |
|------------------------------------|-------------------------------------------------------------------------------------------------------------------------------------------------------------------------------------------------------------------------------------------------------------------------------|
| Total fruits (n= 13)               | Summary measure of apples, pears, bananas, kiwis, oranges/grapefruits, mandarins/clementines, grapes, peaches/clingstones, apricots, plums, strawberries, melon, and fruit cocktails                                                                                          |
| Total vegetables (n= 19)           | Summary measure of tomatoes (in and out of season), peppers, carrots, salad, peas, beans/chick peas, mushrooms, broccoli, turnips, savoy, black cabbage, onions, cooked spinach/swiss chard/beets/rabes, cooked eggplants/zucchini/string beans, artichokes/fennel, and beets |
| Total fruits and vegetables (n=17) | Summary measure of tomatoes, peppers, carrots, salad, peas, beans/chick peas, mushrooms, broccoli, turnips, savoy, black cabbage, onions, spinach/swiss chard/coste/erbette cotte, cooked eggplants/zucchini/string beans, artichokes/fennel, and beets                       |
| Quercetin-rich foods (n=11)        | Summary measure of apples, grapes, onions, artichoke/fennel/celery, beans/chick peas, apricots, plum, turnips, peppers, strawberries, tomatoes, and broccoli                                                                                                                  |
| Red meat (n=9)                     | Summary measure of beef steak, hamburger, pork chops, veal chop/cutlet, cooked ham (prosciutto cotto), smoked ham (prosciutto crudo), cured ham (speck), salami, baloney (mortadella), wurstel, salted sliced beef, coppa, pancetta, and other types of processed meats       |

---

**Supplemental Table 2:** Selected metabolic genes and SNPs included in the study

| Gene                  | Protein                                               | Major function                                     | Location  | No. of SNPs | SNP rs # <sup>a</sup> | Nucleotide change     | Putatively functional location in gene | Also called | MAF <sup>b</sup> |
|-----------------------|-------------------------------------------------------|----------------------------------------------------|-----------|-------------|-----------------------|-----------------------|----------------------------------------|-------------|------------------|
| <b>Phase I genes</b>  |                                                       |                                                    |           |             |                       |                       |                                        |             |                  |
| <i>CYP1A1</i>         | Cytochrome P450, family 1, subfamily A, polypeptide 1 | Metabolize some PAHs to carcinogenic intermediates | 15q22-q24 | 4           | rs2606345             | UVS1+298C>T           | Intron                                 | CYP1A1_14   | 0.36             |
|                       |                                                       |                                                    |           |             | rs2198843             | 11599bp 3' of STP C>G |                                        | CYP1A1_78   | 0.14             |
|                       |                                                       |                                                    |           |             | rs2472299             | -17961T>C             |                                        | CYP1A1_81   | 0.31             |
|                       |                                                       |                                                    |           |             | rs2470893             | -4010A>G              |                                        | CYP1A1_114  | 0.18             |
| <i>CYP1A2</i>         | Cytochrome P450, family 1, subfamily A, polypeptide 2 | Metabolize some PAHs to carcinogenic intermediates | 15q24     | 1           | rs11072508            | 14967bp 3' of S       |                                        | CYP1A2_79   | 0.39             |
| <i>CYP1B1</i>         | cytochrome P450, family 1, subfamily B, polypeptide 1 | Metabolize some PAHs to carcinogenic intermediates | 2p21      | 5           | rs1800440             | Ex3+315A>G            |                                        | CYP1B1_07   | 0.17             |
|                       |                                                       |                                                    |           |             | rs10175368            | -5329G>A              |                                        | CYP1B1_18   | 0.26             |
|                       |                                                       |                                                    |           |             | rs162556              | -3922C>T              |                                        | CYP1B1_27   | 0.45             |
|                       |                                                       |                                                    |           |             | rs162562              | Ex3+939C>A            |                                        | CYP1B1_31   | 0.13             |
|                       |                                                       |                                                    |           |             | rs162557              | -2919C>T              |                                        | CYP1B1_42   | 0.14             |
| <b>Phase II Genes</b> |                                                       |                                                    |           |             |                       |                       |                                        |             |                  |
| <i>GST1A1</i>         | Glutathione S-transferase alpha 1                     | Metabolize xenobiotic substrates                   | 6p12.1    | 1           | <u>rs3957357</u>      | -4621T>C              |                                        | GST1A1_01   | 0.43             |
| <i>GST1A4</i>         | Glutathione S-transferase alpha 4                     | Metabolize xenobiotic substrates                   | 6p12.1    | 1           | rs316128              | IVS5+116C>A           |                                        | GST1A4_05   | 0.45             |
| <i>GSTM3</i>          | Glutathione S-transferase mu 3                        | Metabolize xenobiotic substrates                   | 1p13.3    | 3           | rs7483                | Ex8+91G>A             |                                        | GSTM3_01    | 0.26             |
|                       |                                                       |                                                    |           |             | rs1799735             | IVS6+22AGG>-          |                                        | GSTM3_02    | 0.15             |
|                       |                                                       |                                                    |           |             | rs1537234             | IVS7-30G>T            |                                        | GSTM3_06    | 0.36             |
| <i>GSTP1</i>          | Glutathione S-transferase pi 1                        | Metabolize xenobiotic substrates                   | 11q13     | 1           | rs1695                | Ex5-24A>G             | Exon 5                                 | GSTP1_01    | 0.29             |

<sup>a</sup>Number of SNPs typed in the study<sup>b</sup>Minor Allele Frequency based on controlsInformation obtained from snp500Cancer Database (<http://snp500cancer.nci.nih.gov>)

**Supplemental Table 3:** OR\*s and 95% CIs for selected *CYP450* and *GST* genes and SNPs and lung cancer risk, EAGLE

|                                 | case/control | OR*  | 95% CI    | p-trend |
|---------------------------------|--------------|------|-----------|---------|
| <b><i>CYP450s</i></b>           |              |      |           |         |
| <i>CYP1A1</i> _14 (rs2606345)   |              |      |           |         |
| GG                              | 749/781      | 1.0  | (ref)     |         |
| GT                              | 770/882      | 0.92 | 0.80-1.1  |         |
| TT                              | 217/248      | 0.92 | 0.74-1.1  | 0.24    |
| GT + TT                         | 987/1130     | 0.91 | 0.80-1.0  |         |
| <i>CYP1A1</i> _78 (rs2198843)   |              |      |           |         |
| GG                              | 1188/1318    | 1.0  | (ref)     |         |
| CG                              | 482/534      | 1.0  | 0.87-1.2  |         |
| CC                              | 67/60        | 1.2  | 0.87-1.8  | 0.44    |
| CG+CC                           | 549/594      | 1.0  | 0.89-1.2  |         |
| <i>CYP1A1</i> _81 (rs2472299)   |              |      |           |         |
| CC                              | 816/900      | 1.0  | (ref)     |         |
| CT                              | 719/802      | 0.98 | 0.85-1.1  |         |
| TT                              | 201/216      | 1.0  | 0.83-1.3  | 0.97    |
| CT+TT                           | 920/1018     | 1.0  | 0.88-1.1  |         |
| <i>CYP1A1</i> _114 (rs2470893 ) |              |      |           |         |
| GG                              | 1088/1214    | 1.0  | (ref)     |         |
| GT                              | 558/622      | 1.0  | 0.87-1.1  |         |
| TT                              | 88/74        | 1.34 | 0.97-1.9  | 0.29    |
| GT+TT                           | 646/696      | 1.0  | 0.91-1.2  |         |
| <i>CYP1A2</i> _79 (rs11072508)  |              |      |           |         |
| AA                              | 647/714      | 1.0  | (ref)     |         |
| AB                              | 801/911      | 0.97 | 0.84-1.1  |         |
| BB                              | 284/289      | 1.1  | 0.89-1.3  | 0.63    |
| AB+BB                           | 1085/1200    | 1.0  | 0.87-1.1  |         |
| <i>CYP1B1</i> _07 (rs1800440)   |              |      |           |         |
| AA                              | 1096/1225    | 1.0  | (ref)     |         |
| AG                              | 550/612      | 1.0  | 0.87-1.2  |         |
| GG                              | 87/78        | 1.2  | 0.90-1.7  | 0.42    |
| AG+GG                           | 637/690      | 1.0  | 0.90-1.2  |         |
| <i>CYP1B1</i> _18 (rs10175368)  |              |      |           |         |
| GG                              | 921/992      | 1.0  | (ref)     |         |
| GA                              | 698/750      | 1.0  | 0.88-1.2  |         |
| AA                              | 112/163      | 0.74 | 0.58-0.96 | 0.14    |
| GA+AA                           | 810/913      | 0.96 | 0.84-1.1  |         |
| <i>CYP1B1</i> _27 (rs162556)    |              |      |           |         |
| CC                              | 481/583      | 1.0  | (ref)     |         |
| CT                              | 885/949      | 1.1  | 0.97-1.3  |         |
| TT                              | 362/377      | 1.2  | 0.96-1.4  | 0.10    |
| CT+TT                           | 1247/1326    | 1.1  | 0.99-1.3  |         |
| <i>CYP1B1</i> _31 (rs162562)    |              |      |           |         |
| CC                              | 1231/1370    | 1.0  | (ref)     |         |
| CT                              | 452/494      | 1.0  | 0.88-1.2  |         |
| TT                              | 54/50        | 1.2  | 0.82-1.8  | 0.45    |
| CT+TT                           | 506/544      | 1.0  | 0.90-1.2  |         |
| <i>CYP1B1</i> _42 (rs162557)    |              |      |           |         |
| AA                              | 1185/1323    | 1.0  | (ref)     |         |
| AC                              | 488/536      | 1.0  | 0.88-1.2  |         |
| CC                              | 64/57        | 1.3  | 0.87-1.8  | 0.35    |
| AC+CC                           | 552/593      | 1.0  | 0.90-1.2  |         |

**GSTs**

|                             |           |      |          |  |      |
|-----------------------------|-----------|------|----------|--|------|
| <i>GSTAI_01</i> (rs3957357) |           |      |          |  |      |
| TT                          | 554/636   | 1.0  | (ref)    |  |      |
| TC                          | 844/904   | 1.1  | 0.93-1.3 |  |      |
| CC                          | 331/363   | 1.1  | 0.88-1.3 |  | 0.45 |
| TC + CC                     | 1175/1267 | 1.1  | 0.93-1.2 |  |      |
| <i>GST44_05</i> (rs1051535) |           |      |          |  |      |
| CC                          | 534/605   | 1.0  | (ref)    |  |      |
| CA                          | 864/964   | 1.0  | 0.88-1.2 |  |      |
| AA                          | 337/346   | 1.1  | 0.92-1.3 |  | 0.33 |
| CA+AA                       | 1201/1310 | 1.0  | 0.90-1.2 |  |      |
| <i>GSTM3_01</i> (rs7483)    |           |      |          |  |      |
| GG                          | 921/968   | 1.0  | (ref)    |  |      |
| GA                          | 648/756   | 0.90 | 0.78-1.0 |  |      |
| AA                          | 118/156   | 0.80 | 0.62-1.0 |  | 0.04 |
| GA+AA                       | 766/912   | 0.88 | 0.77-1.0 |  |      |
| <i>GSTM3_02</i> (rs1799735) |           |      |          |  |      |
| +/+                         | 1188/1300 | 1.0  | (ref)    |  |      |
| +/-                         | 496/551   | 0.98 | 0.85-1.1 |  |      |
| -/-                         | 52/64     | 0.89 | 0.61-1.3 |  | 0.61 |
| +/- & -/-                   | 548/615   | 0.98 | 0.85-1.1 |  |      |
| <i>GSTM3_06</i> (rs1537234) |           |      |          |  |      |
| TT                          | 655/761   | 1.0  | (ref)    |  |      |
| GT                          | 827/869   | 1.1  | 0.96-1.3 |  |      |
| GG                          | 245/272   | 1.1  | 0.86-1.3 |  | 0.38 |
| GT + GG                     | 1072/1141 | 1.1  | 0.96-1.2 |  |      |
| <i>GSTP1_01</i> (rs1695)    |           |      |          |  |      |
| AA                          | 853/932   | 1.0  | (ref)    |  |      |
| AG                          | 732/796   | 1.0  | 0.87-1.2 |  |      |
| GG                          | 151/185   | 0.89 | 0.71-1.1 |  | 0.51 |
| AG+GG                       | 883/981   | 0.98 | 0.86-1.1 |  |      |

\*Adjusted for age and sex

**Supplemental Table 4:** Selected characteristics comparing high versus low consumers of quercetin-rich foods, EAGLE

|                                        | <b>Low consumer</b> | <b>High consumer</b> | <b>p-value</b>      |
|----------------------------------------|---------------------|----------------------|---------------------|
| Quercetin-rich foods, servings per day |                     |                      |                     |
| Mean (SD)                              | 0.58 (0.16)         | 2.5 (0.54)           | <0.001 <sup>a</sup> |
| Female (%)                             | 2 (12.5)            | 12 (54.6)            | 0.008 <sup>b</sup>  |
| Male (%)                               | 14 (87.5)           | 10 (45.5)            |                     |
| Age, (%)                               |                     |                      |                     |
| < median                               | 12 (50.0)           | 12 (50.0)            | 0.03 <sup>b</sup>   |
| ≥ median                               | 2 (14.3)            | 12 (85.7)            |                     |
| BMI, kg/m <sup>2</sup>                 |                     |                      |                     |
| Mean (SD)                              | 23.8 (3.7)          | 24.7 (4.3)           | 0.51 <sup>a</sup>   |
| Smoking status                         |                     |                      |                     |
| Never                                  | 2 (14.3)            | 8 (33.3)             | 0.13 <sup>b</sup>   |
| Former                                 | 4 (28.6)            | 10 (41.7)            |                     |
| Current                                | 8 (57.1)            | 6 (25.0)             |                     |

<sup>a</sup>ttest

<sup>b</sup>Chi-square test

SD = Standard Deviation

**Supplemental Table 5:** Odds ratios (ORs)<sup>†</sup> and 95% confidence intervals (CIs) for lung cancer by quintiles<sup>‡</sup> of isothiocyanate-rich foods, EAGLE

| Quintile                               | Case/<br>control | Q1<br>(lowest) | Case/<br>control | Q2                 | Case/<br>control | Q3                 | Case/<br>control | Q4                 | Case/<br>control | Q5<br>(highest)   | p-trend |
|----------------------------------------|------------------|----------------|------------------|--------------------|------------------|--------------------|------------------|--------------------|------------------|-------------------|---------|
| Isothiocyanate-rich foods <sup>1</sup> |                  |                |                  |                    |                  |                    |                  |                    |                  |                   |         |
| All                                    | 361/413          | 1.0 (ref)      | 361/398          | 1.09<br>(0.86-1.4) | 364/393          | 1.1<br>(0.89-1.4)  | 333/392          | 1.0<br>(0.80-1.3)  | 386/395          | 1.1<br>(0.88-1.4) | 0.55    |
| Female                                 | 76/90            | 1.0 (ref)      | 73/90            | 1.0<br>(0.62-1.8)  | 71/90            | 0.70<br>(0.41-1.2) | 71/90            | 0.87<br>(0.51-1.5) | 68/89            | 1.2<br>(0.67-2.1) | 0.86    |
| Male                                   | 285/323          | 1.0 (ref)      | 288/308          | 1.1<br>(0.86-1.5)  | 293/303          | 1.3<br>(0.96-1.7)  | 262/302          | 1.1<br>(0.82-1.5)  | 318/306          | 1.1<br>(0.84-1.5) | 0.52    |

<sup>†</sup> All models adjusted for age, gender, area of residence, education, bmi, alcohol consumption, total red meat intake (continuous), cigarette intensity in packs per day (quartile, distribution of controls), duration of cigarettes smoking (continuous, 0 for nonsmokers), years since last cigarette smoked (former smokers only)

<sup>‡</sup> Quintiles of intake: sex-specific, based on the distribution of controls

<sup>1</sup> Total cruciferous vegetables: Summary measure of broccoli, turnips, savoy, and black cabbage.
